# Supplementary material for: Pentoxifylline decreases post-operative intra-abdominal adhesion formation in an animal model
Source: PeerJ. 2018 Aug 24;6:e5434. doi: 10.7717/peerj.5434 (PMC6110259; doi:10.7717/peerj.5434)
Supplement: Data S1 [file peerj-06-5434-s003.xlsx]

## Sheet: Fig. 1
Raw data for Fig. 1
	Scores*		Day3		Day7
		sham (n=7)	PA (n=14)	PA+PTX (n=13)	PA (n=13)	PA+PTX (n=15)
	0	7	0	3	0	4
	1	0	2	4	0	0
	2	0	5	4	0	0
	3	0	4	2	9	9
	4	0	1	0	1	2
	5	0	0	0	3	0
	*Intra-abdominal adhesion score: (0) no adhesion, (1) thin filmy adhesion, (2) more than one thin adhesion, (3) thick adhesion with focal point, (4) thick adhesion with planar attachment, (5) very thick vascular adhesion or more than one planar adhesion

## Sheet: Fig. 3
Raw data for Fig. 3
	total protein (μg/ml)
		Day 3		Day 7
	sham	PA	PA+PTX	PA	PA+PTX
	total protein	total protein	total protein	total protein	total protein
	5669.33	3768.84	2809.68	5441.8	4067.75
	4036.52	3197.81	2974.75	5655.94	4522.79
	4438.03	2881.06	2042.35	5473.03	3621.62
	2671.38	4098.98	3804.53	4125.74	3817.92
	3527.94	3242.42	3242.42	3960.68	3603.78
	3822.38	4402.34	3162.12	4103.44	6525.88
		3969.6	3840.22	3349.49	5531.03
		4460.33	3786.69	4482.64	5517.65
			3550.24		3505.63
	tPA (ng/ml)
		Day 3		Day 7
	sham	PA	PA+PTX	PA	PA+PTX
	tPA	tPA	tPA	tPA	tPA
	0.141	0.577	0.7	0.55	1.927
	0.108	0.607	0.417	0.46	1.448
	0.088	0.392	0.514	0.604	1.601
	0.005	0.734	0.77	0.595	1.295
	0.053	0.563	0.9	1.111	0.904
	0.037	1.239	1.087	1.277	2.093
		0.785	0.555	0.668	2.283
		0.711	0.628	1.421	2.28
			0.631		1.102
	tPA
		Day 3		Day 7
	sham	PA	PA+PTX	PA	PA+PTX
	tPA/ total pt.	tPA/ total pt.	tPA/ total pt.	tPA/ total pt.	tPA/ total pt.
	0.025	0.153	0.249	0.101	0.474
	0.027	0.19	0.14	0.081	0.32
	0.02	0.136	0.252	0.11	0.442
	0.002	0.179	0.202	0.144	0.339
	0.015	0.174	0.278	0.28	0.251
	0.01	0.281	0.344	0.311	0.321
		0.198	0.145	0.199	0.413
		0.159	0.166	0.317	0.413
			0.178		0.314

## Sheet: Fig. 4
Raw data for Fig. 4B								Raw data for Fig. 4C
	ki67+ CD31+ stain								CD31+ stain
		Day3		Day7						Day3		Day7
	sham	PA	PA+PTX	PA	PA+PTX				sham	PA	PA+PTX	PA	PA+PTX
	0	46	2	1	5				0.570979	2.03016	1.24813	2.35758	0.944521
	0	55	8	3	2				0.595577	1.81591	2.34099	2.6755	0.537748
	0	53	12	22	0				0.086318	2.25835	4.46446	5.39814	0.266363
	0	29	6	29	0				2.71171	1.35656	2.46719	4.54168	2.09493
	0	24	6	22	4				0.738026	1.56926	3.79345	6.01521	1.70107
	0	37	3	24	2				0.7559	1.84601	3.32903	6.24373	2.04062
	2	23	2	25	0				0.970699	1.72351	1.77809	7.17841	0.406382
	11	33	5	10	5				1.18317	1.10708	0.801954	3.84672	0.763289
	9	48	3	22	3				1.44779	2.21641	0.854962	6.29914	0.837261
	9	32	3	18	2					1.59915	0.657904	5.84417	0.681763
		24	16	29	3					1.76585	1.15142	3.62855	0.626827
		24	18	22	3					2.83832	1.16791	3.60718	0.997914
		31	9	20	1					2.52035	1.72897	4.50324	0.985764
		36	8	18	7					1.81337	1.17632	3.79591	4.75309
		62	4	12	7					3.19688	0.706987	2.36112	2.78819
		66	12	10						2.9394	1.81377	3.76432
		80	3	2						4.0783	0.568396	3.31858
		18	7	4						1.73919	1.69346	2.61188
		31	2	6						2.05283	2.97307	1.75283
		9	10	15						0.918831	2.61509	1.78712
		39	10	8						0.884755	1.63348	1.09627
		7	13	7						0.393231	2.02392	0.93774
		5	17	13						0.912276	1.68588	2.08679
		16		13						0.671935		1.27248
		21								0.819073
		14
		4
		13
		12
		13

## Sheet: Fig. 5
Raw data for Fig. 5B
	F4/ 80+ stain
		Day3		Day7
	sham	PA	PA+PTX	PA	PA+PTX
	0.003222	1.01682	1.49337	5.13269	2.2055
	0.00236	0.165072	0.364372	2.71284	3.60828
	0.005582	0.27276	0.386732	1.0838	2.04897
	0.036268	0.479938	0.37442	1.50945	1.61659
	0.073972	0.348901	1.39573	0.909988	0.253685
		0.38737	0.55155	0.428742	0.11024
		0.299395	0.325839	3.75813	0.276429
		0.164753	0.574708	2.45743	0.538248
		0.575824	0.427243	4.08838	0.141978
		0.691391	0.292697	1.58489	1.68135
		0.707882	0.609094	4.64047	1.51883
		0.639907	0.757037	4.28072	0.760003
		0.720737	0.484755	2.66882	0.703927
		0.387434	0.707978	0.676048	0.271484
		0.134195	0.234196	1.80725	0.348263
		0.196588	0.175758	0.402681	0.28788
		0.58214	0.710817	1.08645	0.557291
		0.645777	0.037576	5.13269	1.96409
		0.889829	0.075535	2.71284	1.39567
		0.917133	0.069027	1.0838	2.8284
		1.25296	0.200543	1.50945	0.523224
		1.92514	0.214036	0.909988	1.31015
		1.58042	1.72431	0.428742	6.24481
		0.821152	1.42798	3.75813	1.64345
		1.06185	0.292059	2.45743
		0.894518	0.481438	4.08838
		1.47506	0.67962	1.58489
		2.35972	0.33174	4.64047
		1.66782		4.28072
				2.66882
				0.676048
				1.80725
				0.402681
				1.08645
				3.00674
				5.83448
				0.047177
				1.05809
				0.982078
				2.61587
				4.93843
				1.71229
				2.90559
				6.78919
				2.16811
				3.55899
				3.2121
				4.29138
				1.92597
				2.86241
				2.72119
				3.31797
				3.75983
				1.95104

## Sheet: Fig. 6
Raw data for Fig. 6B
	S100A4+ satin
		Day3		Day7
	sham	PA	PA+PTX	PA	PA+PTX
	0.045964	1.78346	3.07111	6.10917	0.154509
	2.30628	0.776788	2.08919	9.94488	0.028803
	1.47843	1.30354	6.83381	6.28537	0.050046
	0.578931	11.1596	0.005614	8.44486	10.6952
		0.723839	0.012344	25.8074	18.2925
		6.15427	0.317949	12.4079	13.8634
		6.94305	0.218431	31.1407	2.36488
		9.2035	0.01665	51.7992	6.18748
		10.5412	0.139549	34.0754	6.53018
		5.10652	0.506748	18.4342	1.54554
		3.10648	0.079296	10.0743	3.22619
		4.83613	0.225895	10.1909	4.3888
		8.22416	0.828716	7.11881	2.1031
			9.81777	16.4915	3.61476
				14.6975	3.58376
				16.3269	1.4657
				24.2607	1.56413
				20.1091
				10.6174
				8.35131
				8.63672
				9.58636
				3.4082
				8.39118
				9.39989
				10.4918
				4.16907
				2.28475
				4.3519
				4.08413
				5.71524
				4.6213
				2.42695
				4.69128
				4.99367
				1.84862
				3.82563
				2.61737
				0.899719

## Sheet: Fig. 7
Raw data for Fig. 7C
	a-SMA+ stain
		Day3		Day7
	sham	PA	PA+PTX	PA	PA+PTX
	0	0.9475	0.587339	24.4322	2.56295
	0	5.13795	2.07089	30.2483	11.7558
	0	4.28672	0.001595	13.8659	6.67183
			0.754134	23.9064	7.45694
			0.195854	12.3643	0.020989
				1.21374	2.22782
				11.1471	1.27844
				11.2677	0.38351
				15.1545	1.45525
				12.0939	0.939845
				7.79225	10.4788
				16.5086	15.0569
				27.4407	0.238821
				25.1558	0.444181
				6.37196
				11.1344
				15.9352
				15.3987
				3.2878
				11.0925
				18.325
				12.4377
				6.50367
				11.5945
				6.18625
				21.7544
				26.2506
				12.1349
				5.60086
				9.95686
				9.09041
				4.87993
				43.7915
				3.22394
				29.3746
				8.82046
				1.07059
				15.1586
				7.63496
				17.5814
				25.8362
				5.76283
				3.18097
				1.14332
