# Supplementary material for: Pentoxifylline decreases post-operative intra-abdominal adhesion formation in an animal model
Source: PubMed Central journal article supplement (PMC6110259; doi:10.7717/peerj.5434), 2018-08-24
Supplement: peerj-06-5434-s001.pdf [file peerj-06-5434-s001.pdf]

Related to Fig. 2A

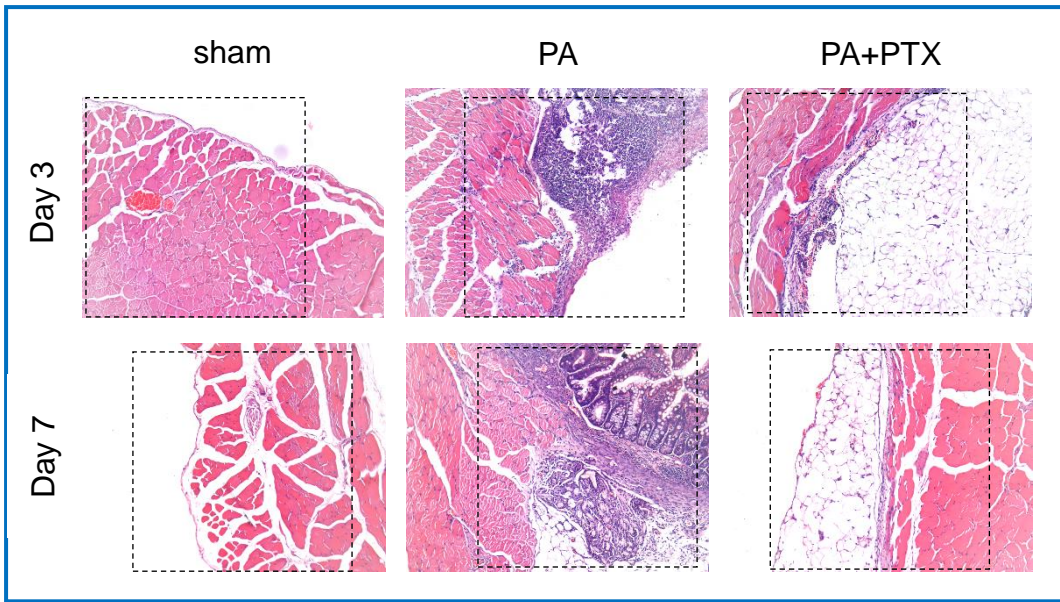

Original magnification  $\times 200$

Related to Fig. 2B

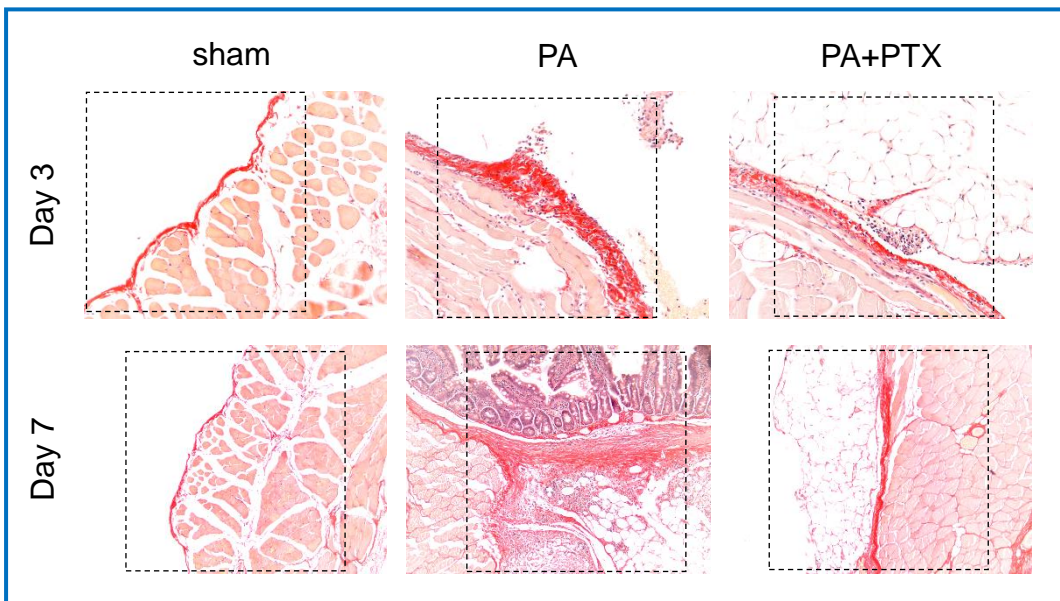

Original magnification  $\times 400$  (upper figure)

Original magnification  $\times 200$  (lower figure)

Related to Fig. 4A

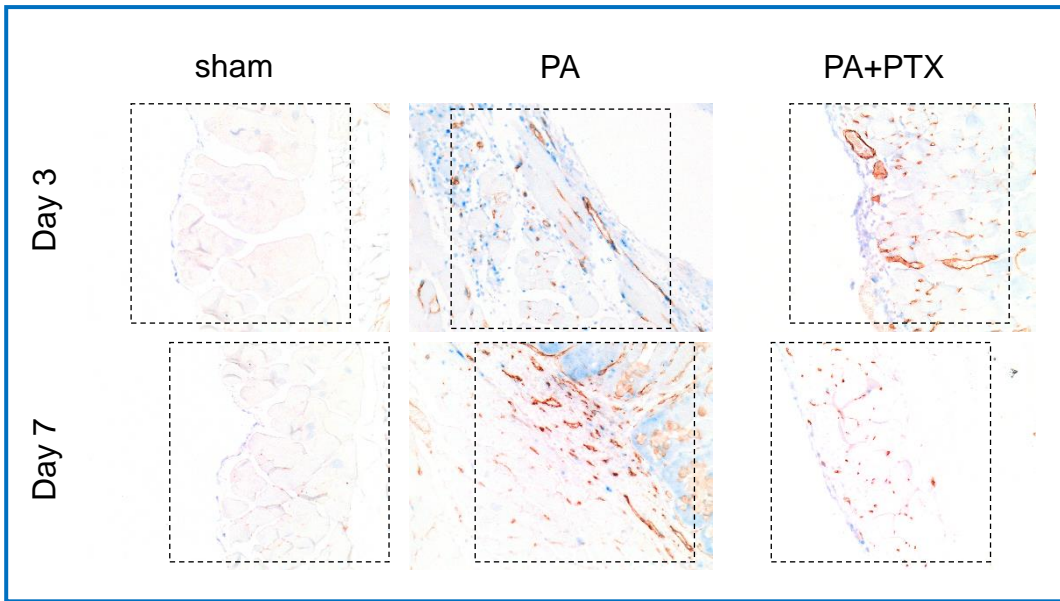

Original magnification  $\times 200$

Related to Fig. 5A

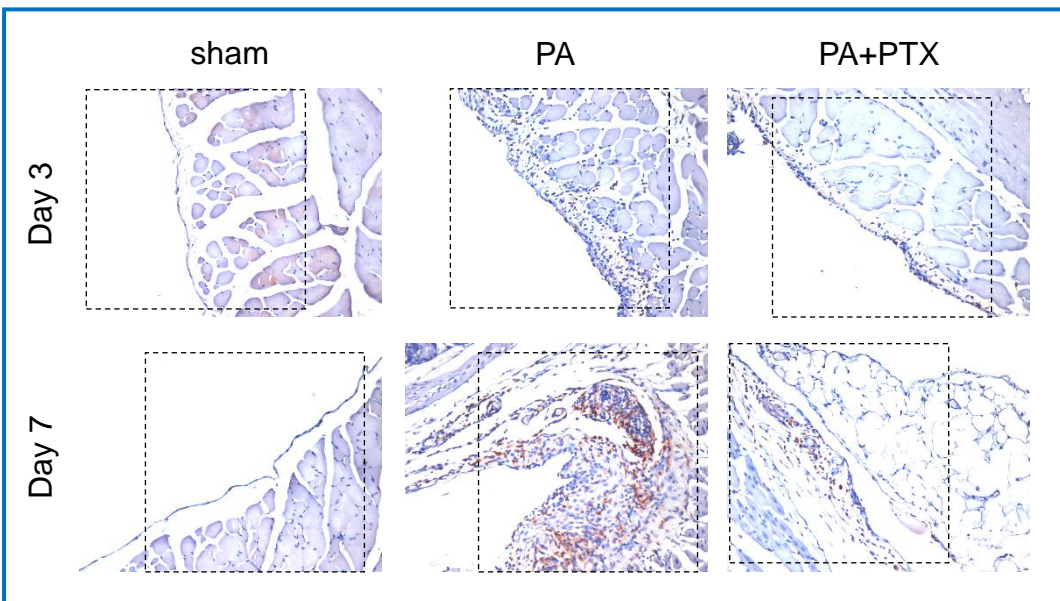

Original magnification  $\times 200$



Related to Fig. 6A

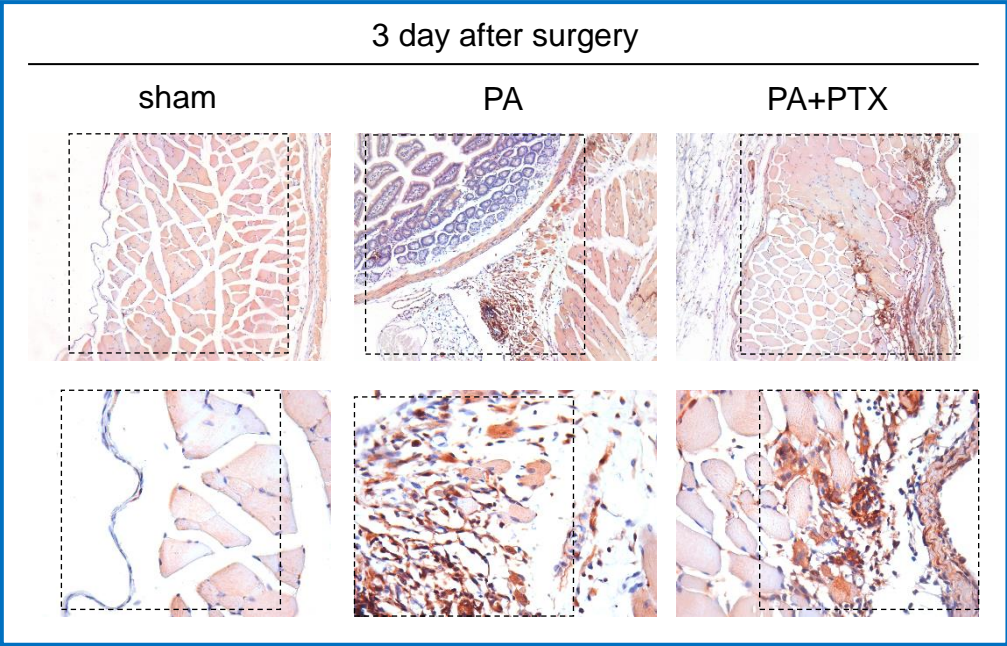

Original magnification  $\times 100$  (upper figure)

Original magnification  $\times 400$  (lower figure)

Related to Fig. 6B

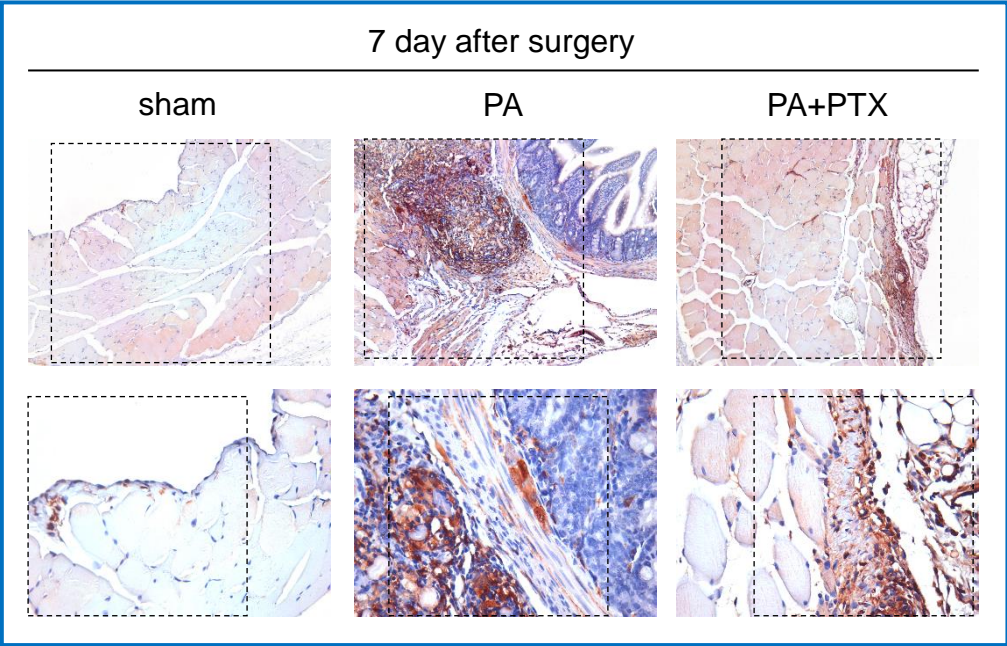

Original magnification  $\times 100$  (upper figure)

Original magnification  $\times 400$  (lower figure)

Related to Fig. 7A

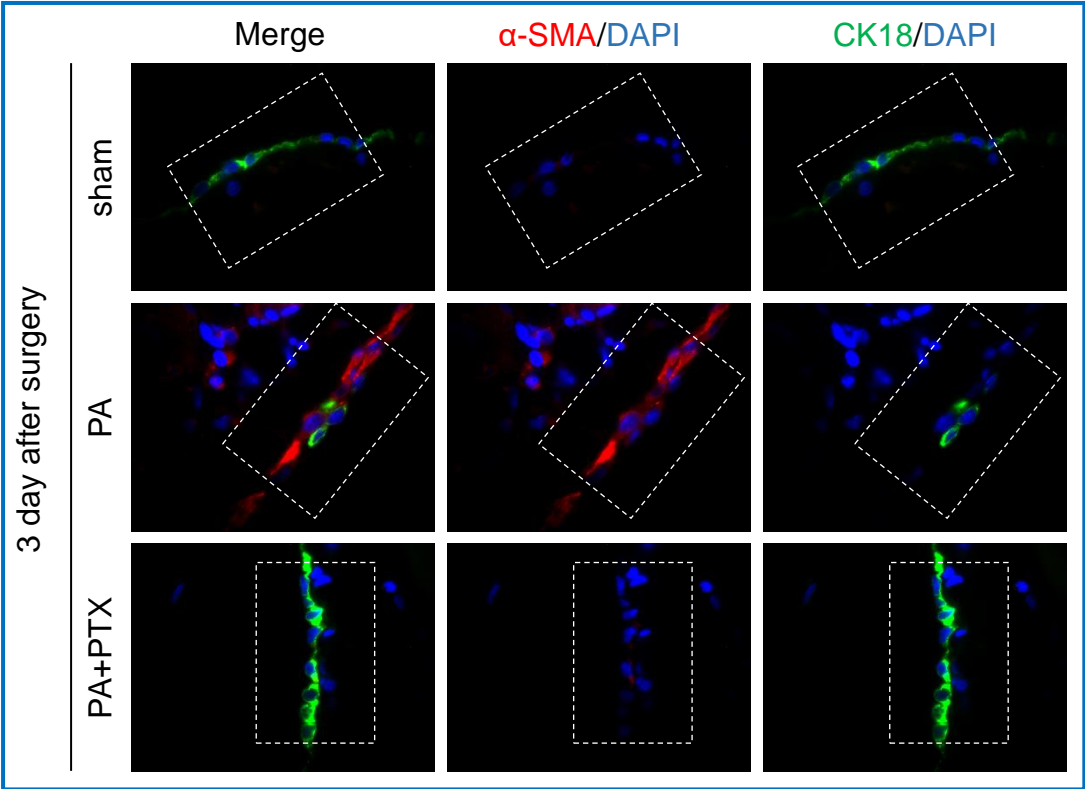

Original magnification  $\times 1000$

Related to Fig. 7B

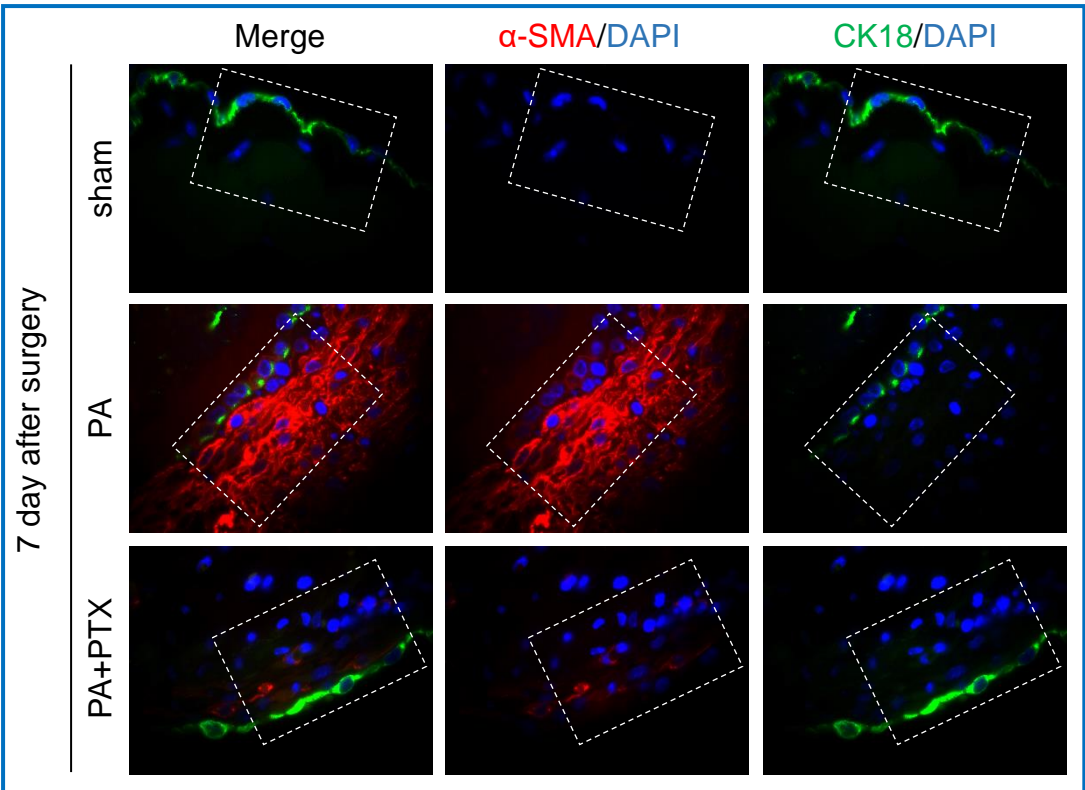

Original magnification  $\times 1000$
